# Supplementary material for: A mitochondria–nucleolus migration fluorescent probe for monitoring of mitochondrial membrane potential and identification of cell apoptosis
Source: Royal Society of Chemistry journal article supplement (doi:10.1039/c9ay01836k), 2019-01-01
Supplement: c9ay01836k1.pdf [file c9ay01836k1.pdf]

***Electronic Supplementary Information (ESI)***

**Mitochondria-nucleolus migration fluorescent probe for monitoring  
of mitochondrial membrane potential and identification of cell  
apoptosis**

Meng-Yang Li, Yan-Hong Liu, Kun Li,\* Hong Zhang, Lei Shi, Xin-Yao Liu, Kang-Kang Yu, Xiao-Qi Yu\*

Key Laboratory of Green Chemistry and Technology, Ministry of Education, College of Chemistry, Sichuan University, Chengdu, 610064, P. R. China

E-mail: kli@scu.edu.cn; xqyu@scu.edu.cn;

## Instruments and Materials

UV-vis absorption spectra were measured in 1 cm quartz cells with a TU-1901 (PERSEE) UV-vis spectrophotometer. A F7000 fluorescence spectrophotometer (HITACHI) at 298 K was used for fluorescence measurements with a 600 V PMT voltage. <sup>1</sup>H NMR and <sup>13</sup>C NMR were measured on an Agilent AM400 NMR spectrometer using TMS as internal standard. High resolution electrospray ionization mass spectra (HR-ESI-MS) were recorded on a BrukerDaltonics Bio TOF mass spectrometer. Fluorescence imaging was conducted on a ZEISS LSM 780 confocal laser scanning microscope.

Unless otherwise noted, materials were obtained from commercial suppliers and were used without further purification. All of solvents used were analytical-reagent grade in synthesis and HPLC in the optical spectroscopic studies.

## DNase and RNase Treatment

HeLa cells were fixed at -20 °C for 10 min in a cold MeOH solution and then washed with PBS three times. DNase (20 µg/mL) or RNase (25 µg/mL) solutions were added into the samples and incubated for 3 h in the cell culture incubator. Then cell samples were incubated with 5 µM **Cz-Bz-1** for another 30 min. The cells were washed with PBS three times and imaged.

## Synthesis

Synthesis of **Cz-Bz-1**: Compound **3**<sup>1</sup> (2.0 mmol, 0.47 g) and **2**<sup>2</sup> (5 mmol, 1.76 g) were dissolved in 50 mL EtOH. 1 drop of piperidine was added and the mixture was refluxed for 12 hours. After cooling to room temperature, the solvent was removed under reduced pressure; the crude product was purified by silica gel column (DCM:MeOH 100:1) to give the product as a red solid (0.54 g) in 30% yield. <sup>1</sup>H NMR (400 MHz, DMSO-*d*<sub>6</sub>) δ 9.39 (s, 2H), 8.73 (d, *J* = 16.0 Hz, 2H), 8.49 (t, *J* = 9.4 Hz, 4H), 8.31 (d, *J* = 8.8 Hz, 2H), 8.23 (d, *J* = 8.0 Hz, 2H), 8.14 (d, *J* = 8.8 Hz, 2H), 7.95 (d, *J* = 8.4 Hz, 2H), 7.91-7.80 (m, 4H), 7.73 (t, *J* = 7.0 Hz, 2H), 4.37 (s, 6H), 4.09 (s, 3H), 2.10 (s, 12H). <sup>13</sup>C NMR (100 MHz, DMSO-*d*<sub>6</sub>) δ 182.0 (s), 153.3 (s), 144.5 (s), 139.6 (s), 137.6 (s), 133.0 (s), 130.8 (s), 130.1 (s), 128.4 (s), 127.2 (s), 127.0 (s), 126.7 (s), 124.6 (s), 123.2 (s), 113.3 (s), 111.3 (s), 110.1 (s), 53.5 (s), 35.3 (s), 30.1 (s), 25.5 (s). HRMS (*m/z*): [M-2I]<sup>2+</sup> calcd. for C<sub>47</sub>H<sub>43</sub>N<sub>3</sub><sup>2+</sup>, 324.6723, found 324.6707.

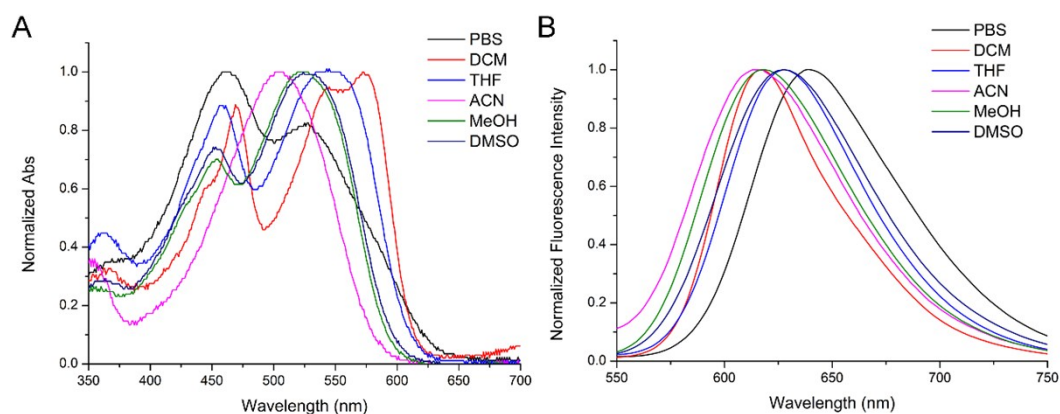

**Fig. S1** Normalized absorption (A) and fluorescence spectra (B) of **Cz-Bz-1** (2  $\mu\text{M}$ ) in different solvents.  $\lambda_{\text{ex}} = 460$  nm.

**Table S1:** Photophysical properties of **Cz-Bz-1** in different solvents.

| Solvents | Maxima $\lambda_{\text{ab}}$ | Maxima $\lambda_{\text{em}}$ | $\epsilon$ ( $\text{M}^{-1} \cdot \text{cm}^{-1}$ ) | $\Phi$ (%) |
|----------|------------------------------|------------------------------|-----------------------------------------------------|------------|
| PBS      | 460                          | 640                          | 43000                                               | 1.5        |
| DCM      | 572                          | 617                          | 49000                                               | 4.8        |
| THF      | 534                          | 628                          | 43500                                               | 2.1        |
| ACN      | 501                          | 614                          | 37500                                               | --         |
| MeOH     | 519                          | 619                          | 58500                                               | 4.1        |
| DMSO     | 524                          | 628                          | 56500                                               | 5.8        |

$\epsilon$  ( $\text{M}^{-1} \text{cm}^{-1}$ ): molar absorption coefficients at maximum absorption wavelengths,  $\Phi$ : absolute fluorescence quantum yields in different solvents.

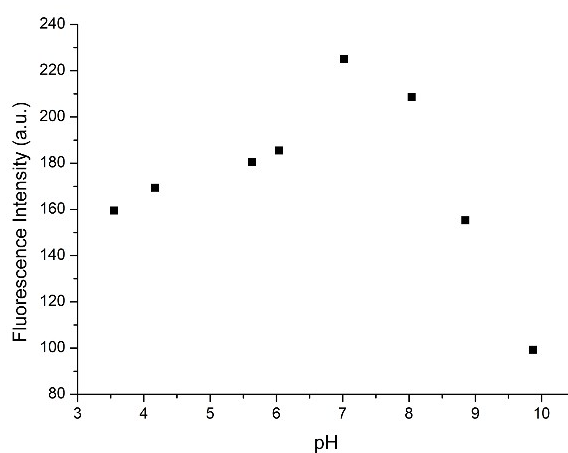

**Fig. S2** Fluorescence intensity ( $\lambda_{\text{em}} = 640$  nm) of **Cz-Bz-1** (2  $\mu\text{M}$ ) at different pH in PBS.  $\lambda_{\text{ex}} = 460$  nm.

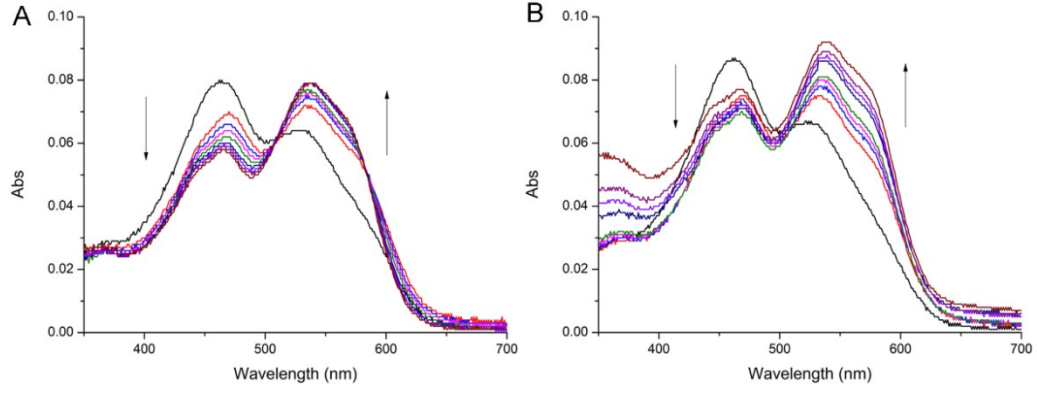

**Fig. S3** Absorption titrations of **Cz-Bz-1** (2 μM) in PBS with increasing concentrations of DNA (A) and RNA (B).

DNA and RNA concentrations: 0-300 μg/mL.

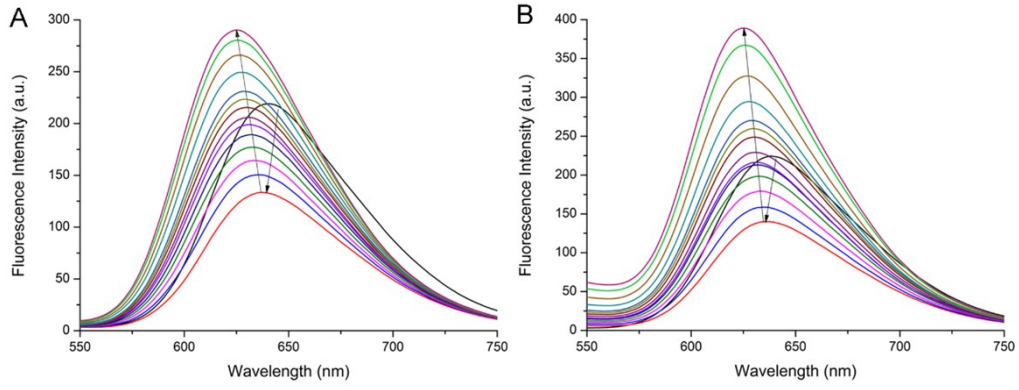

**Fig. S4** Fluorescence titrations of **Cz-Bz-1** (2 μM) in PBS with increasing concentrations of DNA (A) and RNA

(B). DNA and RNA concentrations: 0-300 μg/mL,  $\lambda_{\text{ex}} = 460$  nm.

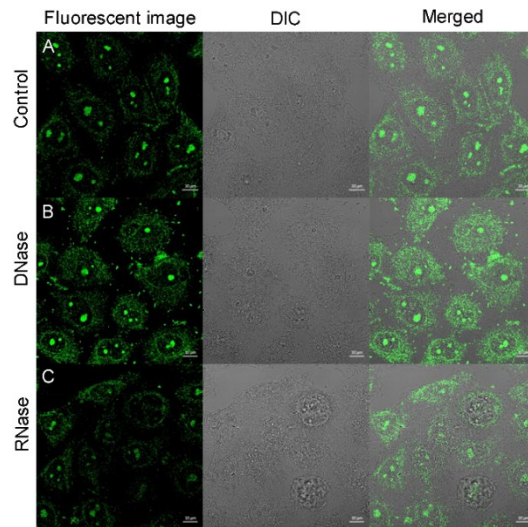

**Fig. S5** Fluorescent images of DNase and RNase digest experiments for **Cz-Bz-1** (5 μM).  $\lambda_{\text{ex}} = 488$  nm,  $\lambda_{\text{em}} = 600-650$  nm; scale bar = 10 μm.

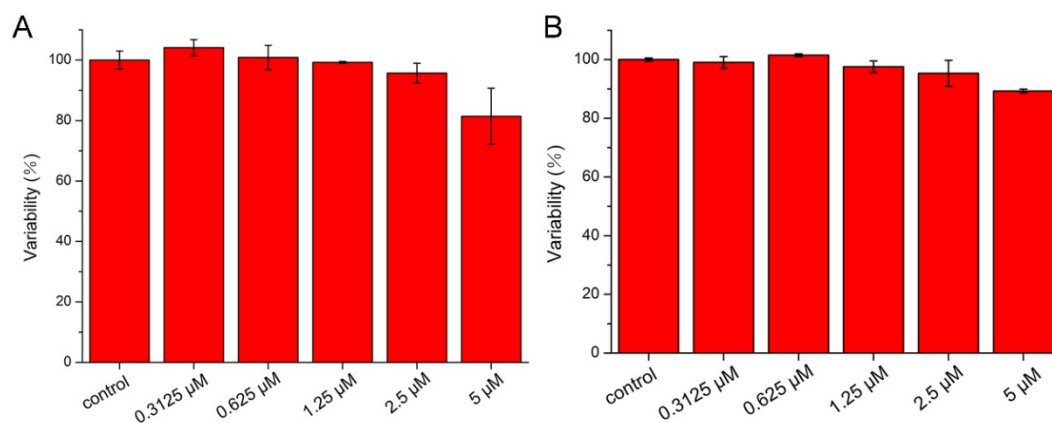

**Fig. S6** MTS (A) and ATP detection (B) results of HeLa cell viabilities after incubation with **Cz-Bz-1** for 24 h at different incubation concentrations. The viability of cells without **Cz-Bz-1** is defined as 100%. The results are expressed as the mean  $\pm$  SD of three separate measurements.

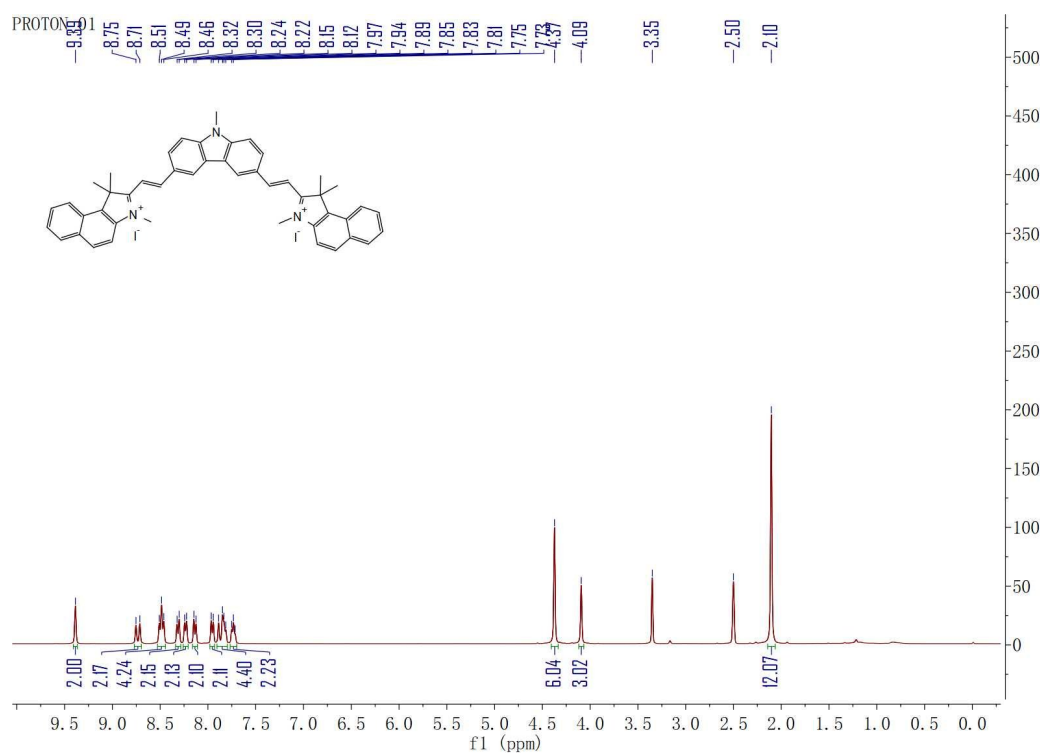

**Fig. S7**  $^1\text{H}$  NMR spectrum of **Cz-Bz-1**.

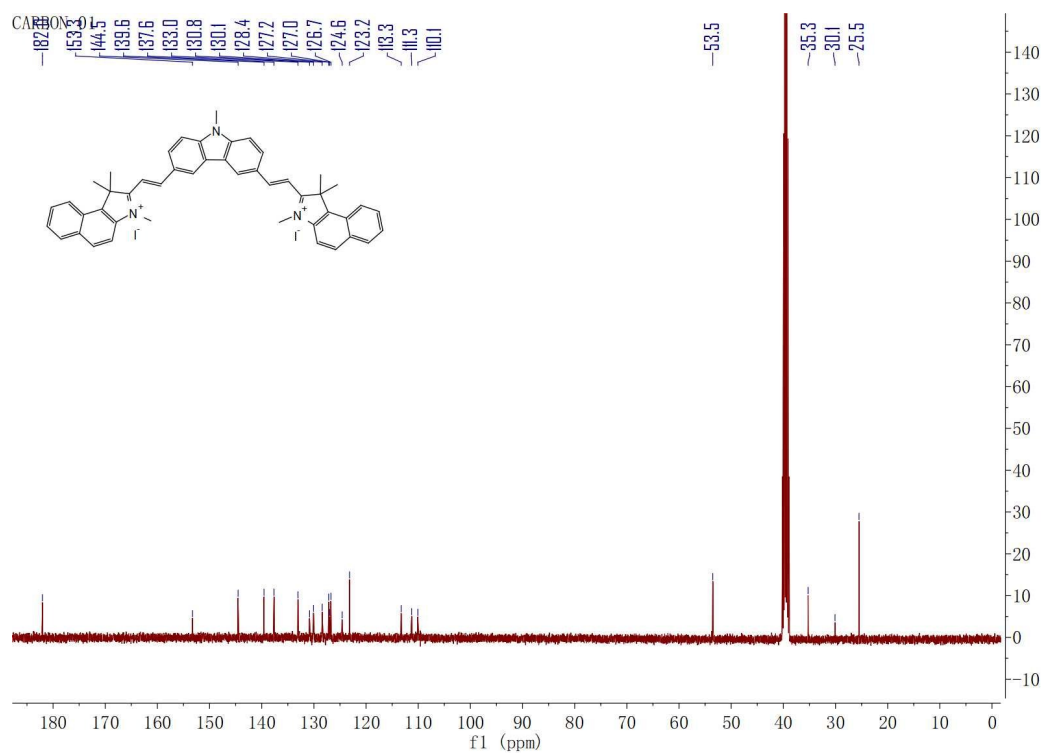

**Fig. S8** <sup>13</sup>C NMR spectrum of Cz-Bz-1.

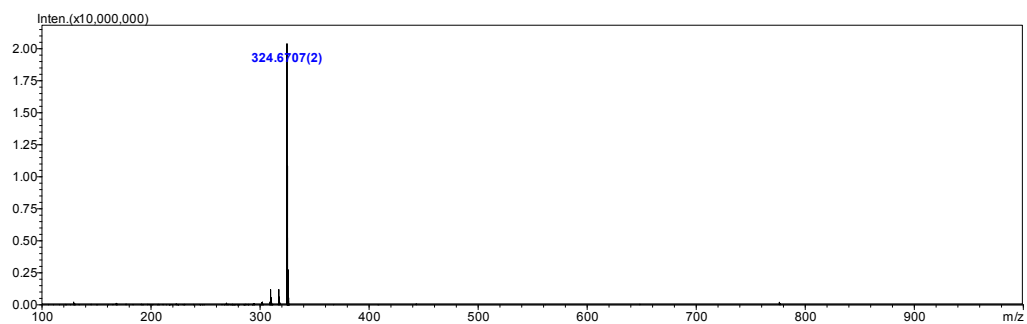

**Fig. S9** HRMS spectrum of Cz-Bz-1.

## Reference

1. M.-Y. Li, P.-C. Cui, K. Li, J.-H. Feng, M.-M. Zou, X.-Q. Yu, *Chin. Chem. Lett.*, 2016, **27**, 330–334.
2. N. Narayanan, G. Patonay, *J. Org. Chem.*, 1995, **60**, 2391-2395.
